# Supplementary material for: In-Silico Identification and Characterization of Universal Stress Protein (USP) Gene Family in Triticum aestivum
Source: Research Square preprint supplement (doi:10.21203/rs.3.rs-1943975/v1), 2022-08-19
Supplement: Supplementary file 1 [file a27ab3682bba9f2b6562dc30.docx]

**List of Supplementary Figures and Tables**

**Supplementary Figure 1. Amino acid composition of *TaUSP* genes.**

**Supplementary Figure 2a, b, c, d. 1.** Disordered regions, **2.** Ramachandran Plot**, 3.** Q-mean Z-scores and **4.** relative protein size in non-redundant protein databank. (2a. TaUSP4, 2b. 10, 2c. 20 and 2d. 30)

**Supplementary Table 1.** *TaUSP* genes and their molecular attributes. **bp:** base pairs; **aa:** amino acid; **pI:** Isoelectric point; **Mw:** Molecular weight, %**ID:** percentage identity.

**Supplementary Table 2**. Identified motif sequences along with their width, number of sites, and respective E-values.

**Supplementary Table 3.** Phosphorylation sites in TaUSPs

**Supplementary Table 4**. Glycosylation sites in TaUSPs

**Supplementary Table 5**. Predicted Secondary structures of TaUSPs

**Supplementary Table 6**. Properties of the predicted protein models

**Supplementary Table 7**. Characteristic features of the binding pockets present in TaUSPs. **å:** Angstrom, **Ala**: Alanine, **Asp**: Aspartate, **Asn:** Asparagine, **Cys**: Cysteine, **Gln**: Glutamine, **Gly:** Glycine, **His:** Histidine, **Ile:** isoleucine, **Leu:** leucine, **Ser:** Serine (Ser), **Thr:** Threonine, **Val:** Valine, **Trp:** Tryptophan and **Tyr:** Tyrosine.


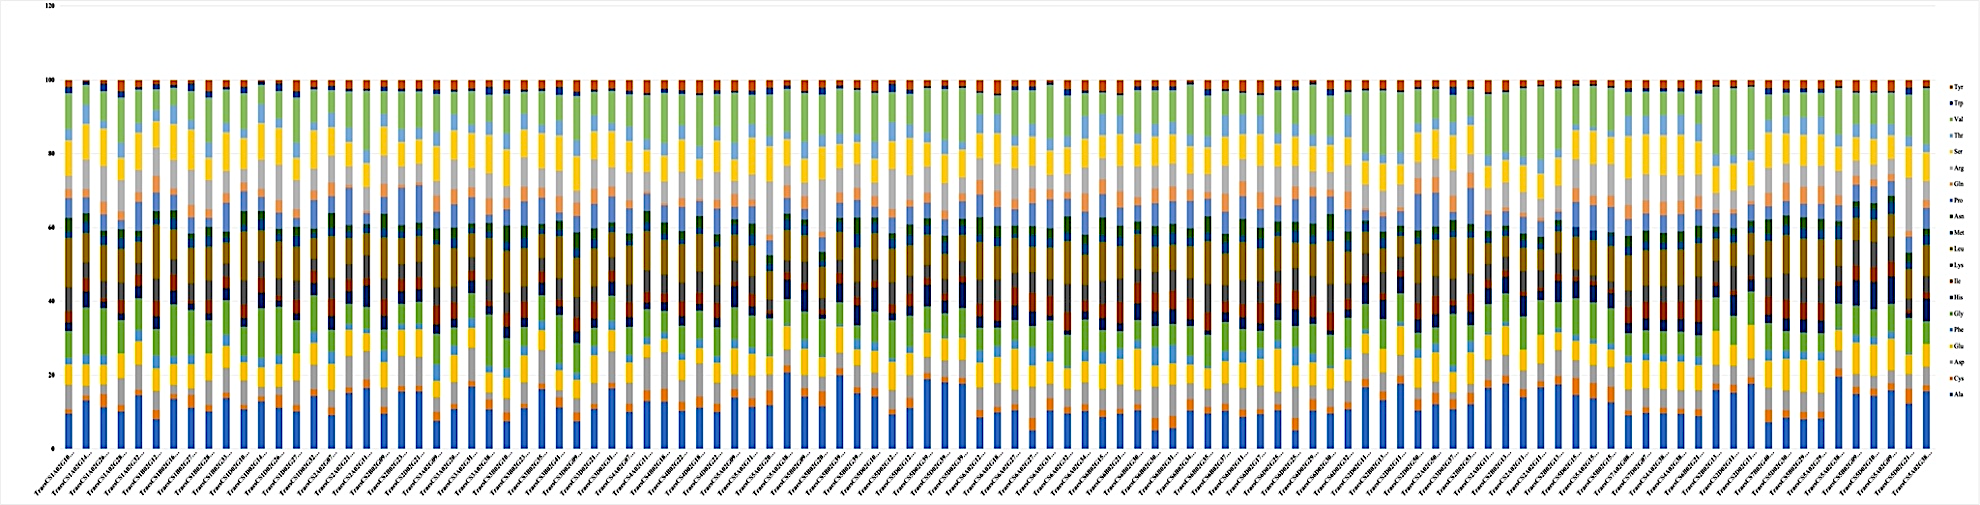


**Supplementary figure 1**

**
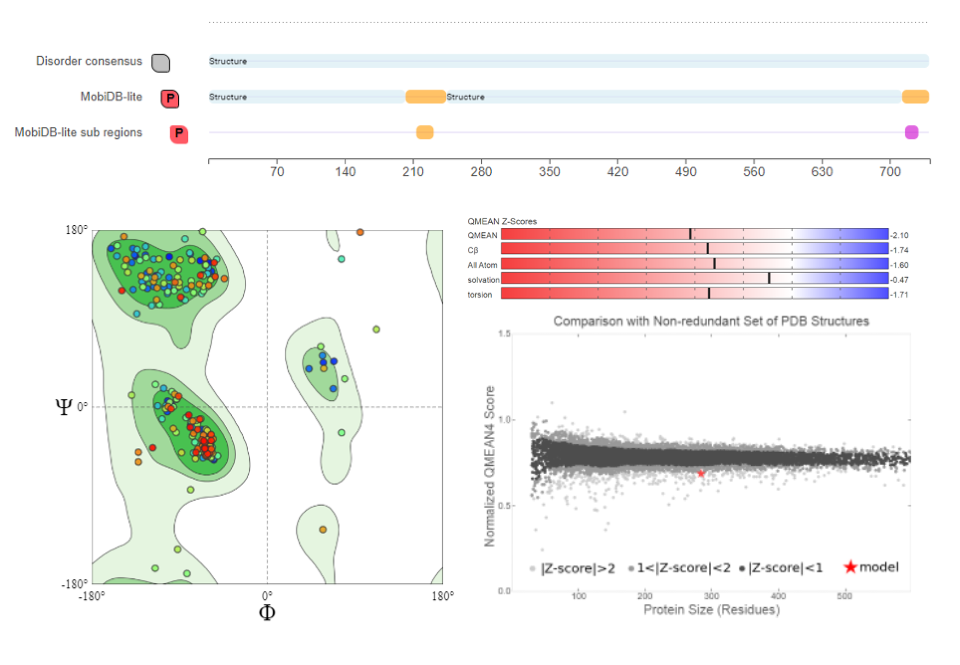
**

**Supplementary figure 2a**

**
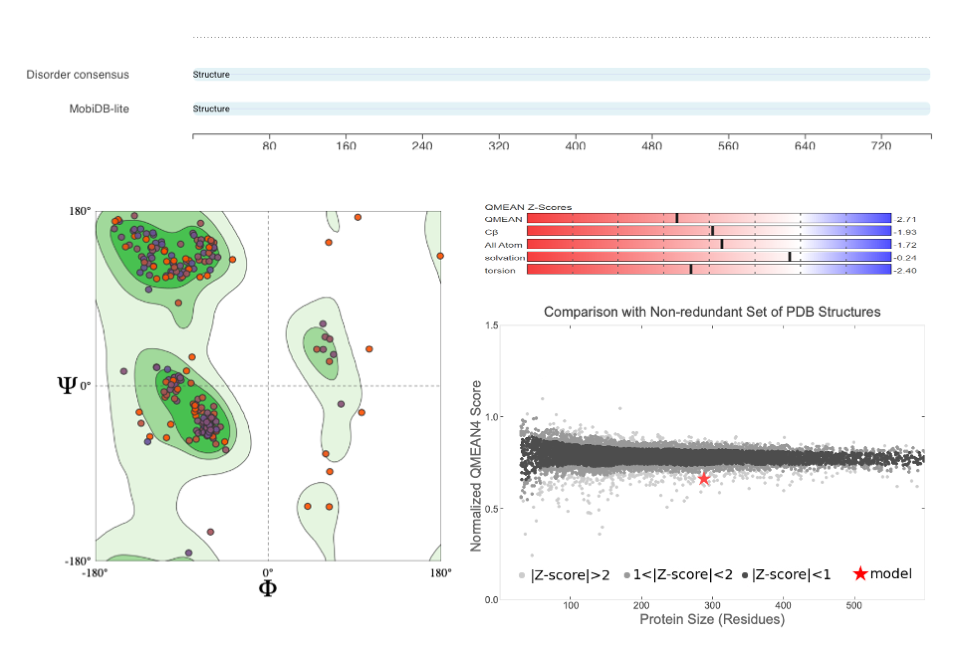
**

**Supplementary figure 2b**

**
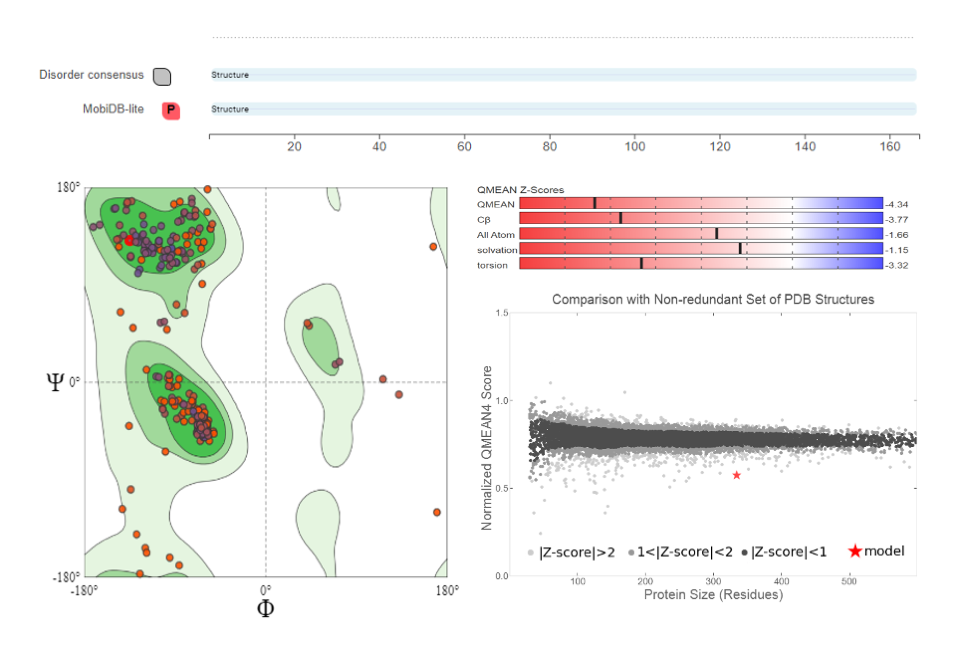
 Supplementary figure 2c**

**
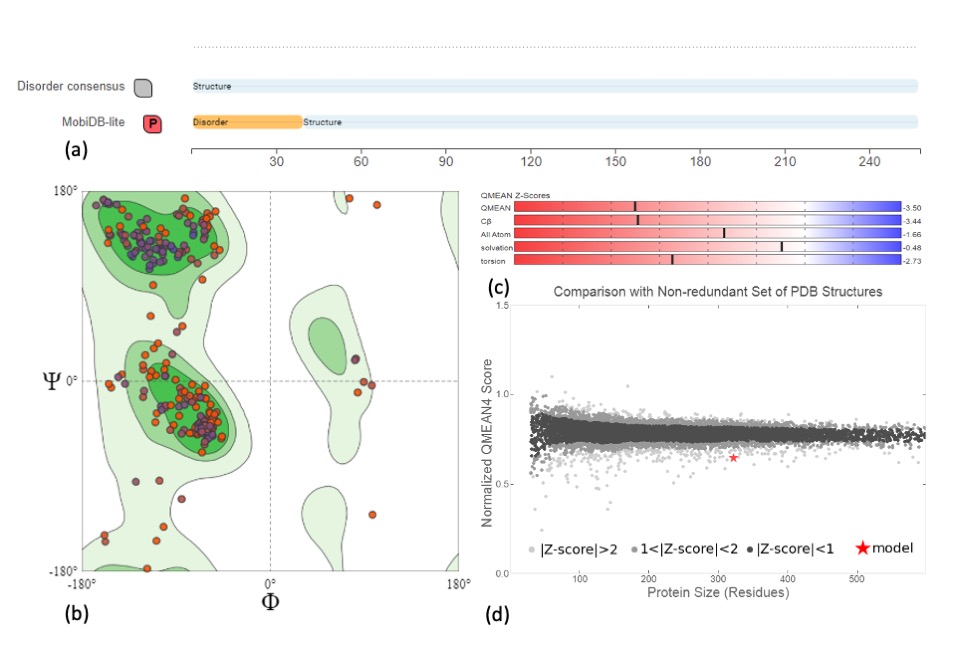
**

**Supplementary figure 2d**

| **S.NO** | **USP** | **Transcript ID** | **CDS (5'-3')** | **bp** | **aa** | **pI** | **Mw** | **Uniprot ID** | **% ID** |
| --- | --- | --- | --- | --- | --- | --- | --- | --- | --- |
| TaUSP1 | TaUSP1(A) | TraesCS3A02G092000.1 | 57,896,894-57,897,900 | 474 | 157 | 7.7 | 17,036.69 | A0A3B6ED93 | 91.2 |
| TaUSP1(B) | TraesCS3B02G107200.1 | 72,707,382-72,708,700 | 839 | 160 | 6.5 | 17,257.84 | W5D407 | 91.2 |
| TaUSP1(D) | TraesCS3D02G091900.1 | 46,477,314-46,478,621 | 812 | 160 | 6.95 | 17,270.88 | A0A3B6GR47 | 91.2 |
| TaUSP3 | TaUSP3(A) | TraesCS2A02G502200.1 | 729,983,524-729,985,675 | 854 | 164 | 6.95 | 17,830.60 | A0A3B6B6Y3 | 77.5 |
| TaUSP3(B) | TraesCS2B02G530300.1 | 725,111,649-725,113,924 | 823 | 164 | 6.59 | 17,888.68 | A0A3B6CEG2 | 76.1 |
| TaUSP3(D) | TraesCS2D02G502700.2 | 596,252,069-596,257,135 | 849 | 162 | 6.29 | 17,655.00 | A0A3B6DK70 | 78.9 |
| TaUSP4 | TaUSP4(A) | TraesCS3A02G208900.1 | 370,238,256-370,240,949 | 2404 | 741 | 6.36 | 82,254.66 | A0A3B6EGE3 | 93.9 |
| TaUSP4(B) | TraesCS3B02G239200.1 | 377,423,224-377,425,803 | 2253 | 750 | 6.7 | 83,204.87 | A0A3B6FML1 | 89 |
| TaUSP4(D) | TraesCS3D02G211800.1 | 283,314,773-283,317,561 | 2223 | 740 | 6.38 | 82,162.64 | A0A3B6GSM4 | 94.5 |
| TaUSP5 | TaUSP5(A) | TraesCS3A02G315600.1 | 556,547,493-556,552,618 | 1462 | 265 | 4.97 | 27,797.96 | A0A3B6EJK0 | 97 |
| TaUSP5(B) | TraesCS3B02G351300.1 | 561,232,274-561,237,503 | 1593 | 264 | 4.97 | 27,768.96 | A0A3B6FUI5 | 97.7 |
| TaUSP5(D) | TraesCS3D02G315900.1 | 429,303,584-429,308,740 | 1607 | 266 | 4.91 | 28,005.23 | A0A077RV05 | 97.7 |
| TaUSP7 | TaUSP7(A) | TraesCS3A02G385900.1 | 635,325,005-635,328,435 | 1246 | 222 | 9.72 | 23,416.75 | A0A3B6EM72 | 80.2 |
| TaUSP7(B) | TraesCS3B02G418000.1 | 655,027,561-655,030,722 | 1194 | 220 | 9.72 | 23,314.70 | A0A077RWQ0 | 88 |
| TaUSP7(D) | TraesCS3D02G378900.1 | 496,070,700-496,073,916 | 1240 | 121 | 9.72 | 23,356.70 | A0A3B6GXT1 | 90.1 |
| TaUSP8 | TaUSP8(A) | TraesCS6A02G122700.1 | 96,440,495-96,446,671 | 2942 | 825 | 6.82 | 91,760.08 | A0A3B6NKQ3 | 82.6 |
| TaUSP8(B) | TraesCS6B02G150900.1 | 152,079,374-152,087,729 | 2780 | 816 | 6.97 | 90,745.13 | A0A3B6PIJ3 | 81.6 |
| TaUSP8(D) | TraesCS6D02G112900.1 | 79,717,057-79,723,059 | 2641 | 825 | 7.14 | 91,707.08 | A0A3B6QEG8 | 81.5 |
| TaUSP9 | TaUSP9(A) | TraesCS6A02G182800.1 | 211,641,602-211,646,433 | 3013 | 730 | 6.74 | 81,674.67 | A0A3B6NMW2 | 96.9 |
| TaUSP9(B) | TraesCS6B02G213600.1 | 288,636,347-288,640,344 | 2157 | 718 | 6.98 | 80,457.43 | A0A3B6PL27 | 95.9 |
| TaUSP9(D) | TraesCS6D02G172000.1 | 158,443,808-158,447,604 | 2178 | 725 | 6.76 | 81,301.34 | A0A3B6QGL1 | 96.3 |
| TaUSP10 | TaUSP10(B) | TraesCS6B02G213500.2 | 288,418,522- 288426,073 | 2,712 | 771 | 8.06 | 85,259.00 | A0A3B6PMJ6 | 94.8 |
| TaUSP11 | TaUSP11(A) | TraesCS6A02G272900.1 | 499,402,075-499,405,572 | 846 | 180 | 5.82 | 20,009.89 | A0A3B6NTC1 | 89 |
| TaUSP11(B) | TraesCS6B02G300300.1 | 538,368,546-538,375,663 | 1056 | 180 | 5.91 | 20,032.93 | A0A3B6PNK0 | 89 |
| TaUSP11(D) | TraesCS6D02G252900.1 | 357,007,445-357,012,404 | 1189 | 180 | 5.77 | 20,032.89 | A0A3B6QJX9 | 87.8 |
| TaUSP12 | TaUSP12(A) | TraesCS6A02G274200.1 | 500,504,948-500,511,282 | 1168 | 177 | 5.96 | 20,007.86 | A0A341X0W9 | 95.5 |
| TaUSP12(B) | TraesCS6B02G301700.1 | 540,590,481-540,596,976 | 1485 | 177 | 5.96 | 20,007.86 | A0A341X0W9 | 95.5 |
| TaUSP12(B) | TraesCS6B02G312700.1 | 560,188,942-560,197,866 | 534 | 177 | 5.96 | 19,979.81 | A0A3B6PNZ9 | 94.9 |
| TaUSP12(D) | TraesCS6D02G254400.1 | 358,976,424-358,982,515 | 1493 | 177 | 6.04 | 19,988.86 | A0A3B6QH30 | 95.5 |
| TaUSP13 | TaUSP13(A) | TraesCS6A02G314000.1 | 550,730,106-550,732,129 | 186 | 162 | 5.66 | 14,871.45 | A0A3B6NU99 | 89.3 |
| TaUSP13(B) | TraesCS6B02G344000.1 | 606,283,698-606,285,748 | 1039 | 162 | 7.64 | 17,039.95 | A0A3B6PQQ9 | 90.5 |
| TaUSP13(D) | TraesCS6D02G293300.1 | 404,217,009-404,219,053 | 1102 | 162 | 6.82 | 17,081.99 | A0A3B6QLB9 | 92.4 |
| TaUSP14 | TaUSP14(A) | TraesCS6A02G323800.1 | 557,093,697-557,095,184 | 1118 | 165 | 8.99 | 17,769.71 | A0A1D6ACE1 | 93.3 |
| TaUSP14(B) | TraesCS6B02G354400.1 | 620,264,708-620,265,976 | 928 | 165 | 8.99 | 17,769.71 | A0A1D6ACE1 | 93.3 |
| TaUSP14(D) | TraesCS6D02G303600.1 | 412,001,031-412,002,174 | 686 | 165 | 8.99 | 17,799.80 | A0A3B6QIP5 | 93.3 |
| TaUSP15 | TaUSP15(A) | TraesCS6A02G346100.1 | 579,437,114-579,440,032 | 2639 | 783 | 6.99 | 85,144.17 | A0A3B6NTL5 | 94.6 |
| TaUSP15(B) | TraesCS6B02G379600.1 | 654,732,927-654,735,781 | 2671 | 824 | 8.45 | 89,872.89 | A0A3B6PQM3 | 97.4 |
| TaUSP15(D) | TraesCS6D02G329000.1 | 433,475,662-433,478,942 | 2992 | 783 | 7.24 | 85,101.30 | A0A3B6QMJ7 | 96 |
| TaUSP16 | TaUSP16(A) | TraesCS4A02G072300.2 | 70,308,291-70,315,265 | 5957 | 662 | 8.81 | 71,920.48 | A0A3B6HR34 | 91.4 |
| TaUSP16(B) | TraesCS4B02G228200.1 | 477,222,946-477,230,431 | 6498 | 655 | 8.56 | 70,926.20 | A0A3B6IT29 | 91.9 |
| TaUSP16(D) | TraesCS4D02G229100.1 | 388,924,735-388,928,689 | 2921 | 655 | 8.81 | 70,924.31 | A0A3B6JL32 | 89.8 |
| TaUSP17 | TaUSP17(A) | TraesCS4A02G119400.1 | 147,444,968-147,446,107 | 892 | 169 | 5.89 | 18,007.77 | A0A3B6HV35 | 92.1 |
| TaUSP17(B) | TraesCS4B02G185100.1 | 324,009,400-324,010,467 | 894 | 171 | 5.59 | 18,322.14 | A0A3B6JHY8 | 92 |
| TaUSP17(D) | TraesCS4D02G186500.1 | 324,009,400-324,010,467 | 894 | 171 | 5.59 | 18,040.78 | A0A3B6JJK8 | 92.1 |
| TaUSP19a | TaUSP19a(A) | TraesCS5A02G389700.1 | 585,428,729-585,430,521 | 769 | 179 | 6.4 | 18,835.58 | A0A3B6KLZ5 | 78.5 |
| TaUSP19a(B) | TraesCS5B02G394700.1 | 572,378,743-572,390,785 | 558 | 158 | 7.83 | 20,255.31 | A0A3B6LTB6 | 78.5 |
| TaUSP19a(D) | TraesCS5D02G399600.1 | 465,029,958-465,031,884 | 795 | 186 | 6.33 | 19,303.96 | A0A3B6MYF0 | 78.5 |
| TaUSP19b | TaUSP19b(A) | TraesCS5A02G389500.1 | 585,420,932-585,426,583 | 552 | 183 | 7.78 | 19,150.97 | A0A3B6KMR9 | 66.7 |
| TaUSP19b(D) | TraesCS5D02G399500.1 | 465,021,465-465,022,640 | 985 | 204 | 8.5 | 21,411.57 | A0A3B6MZC4 | 80.8 |
| TaUSP19c | TaUSP19c(A) | TraesCS5A02G389400.1 | 585,416,279-585,417,372 | 895 | 207 | 6.24 | 21,570.58 | A0A3B6KPM5 | 80.4 |
| TaUSP19c(B) | TraesCS5B02G394600.2 | 572,363,398-572,364,730 | 1141 | 214 | 6.59 | 22,481.74 | A0A3B6LTK0 | 81.6 |
| TaUSP19c(D) | TraesCS5D02G399400.1 | 465,011,742-465,012,857 | 801 | 184 | 7.19 | 19,413.15 | A0A3B6MWL9 | 91.3 |
| TaUSP20 | TaUSP20(A) | TraesCS5A02G114900.1 | 229,924,846-229,927,957 | 2551 | 740 | 6.67 | 79,480.08 | A0A3B6KF03 | 87.9 |
| TaUSP20(D) | TraesCS5D02G125300.1 | 191,899,666-191,904,463 | 2444 | 741 | 6.6 | 79,553.25 | A0A3B6MNF8 | 87.9 |
| TaUSP21 | TaUSP21(A) | TraesCS1A02G106600.1 | 104,377,540-104,379,785 | 1102 | 166 | 5.78 | 17,864.47 | Q2TN84 | 88.2 |
| TaUSP21(B) | TraesCS1B02G124100.1 | 150,662,353-150,664,064 | 752 | 197 | 9.04 | 22,003.50 | A0A3B5YUS5 | 89.8 |
| TaUSP21(D) | TraesCS1D02G108300.1 | 101,093,429-101,096,021 | 1134 | 166 | 6.06 | 17,772.46 | A0A3B5ZR06 | 89 |
| TaUSP24 | TaUSP24(A) | TraesCS1A02G267800.1 | 462,776,185-462,778,584 | 687 | 288 | 10 | 24,254.90 | A0A3B5Y2A8 | 88.5 |
| TaUSP24(B) | TraesCS1B02G278500.1 | 486,846,591-486,849,061 | 696 | 231 | 9.9 | 24,630.27 | A0A3B5YZB3 | 91.7 |
| TaUSP24(D) | TraesCS1D02G267700.1 | 363,618,945-363,621,881 | 1198 | 231 | 9.9 | 24,552.19 | A0A3B5ZXY9 | 88.5 |
| TaUSP25 | TaUSP25(A) | TraesCS1A02G280700.1 | 478,450,779-478,452,828 | 731 | 166 | 6.31 | 18,141.73 | A0A3B5Y2C9 | 88.1 |
| TaUSP25(B) | TraesCS1B02G289700.1 | 505,110,468-505,113,544 | 877 | 166 | 6.31 | 18,127.74 | A0A1D6RE03 | 88.1 |
| TaUSP25(D) | TraesCS1D02G279800.1 | 377,910,422-377,914,063 | 985 | 166 | 6.31 | 18,127.74 | A0A1D6RE03 | 89.4 |
| TaUSP26 | TaUSP26(A) | TraesCS1A02G321000.1 | 511,481,306-511,484,164 | 1300 | 267 | 5.35 | 27,992.20 | A0A3B5Y470 | 94 |
| TaUSP26(B) | TraesCS1B02G333600.1 | 560,175,742-560,178,662 | 1326 | 268 | 5.58 | 28,050.28 | A0A3B5Z2J5 | 93.2 |
| TaUSP26(D) | TraesCS1D02G321100.1 | 414,706,779-414,707,723 | 816 | 271 | 5.58 | 28,050.28 | A0A3B5Z2J5 | 94 |
| TaUSP27a | TaUSP27a(A) | TraesCS4A02G382700.1 | 660,790,453-660,795,671 | 3012 | 824 | 6.62 | 90,125.78 | A0A3B6I0H7 | 84.6 |
| TaUSP27a(A) | TraesCS4A02G382900.1 | 660,916,337-660,921,619 | 3039 | 825 | 6.26 | 90,411.95 | A0A3B6I0I0 | 84.6 |
| TaUSP27b | TaUSP27b(A) | TraesCS7A02G084400.3 | 49,046,290-49,052,241 | 3515 | 826 | 6.32 | 90,657.06 | A0A3B6RCH6 | 84.6 |
| TaUSP27b(D) | TraesCS7D02G079400.1 | 46,838,388-46,843,665 | 2977 | 844 | 6.3 | 90,220.86 | A0A3B6TD12 | 82.7 |
| TaUSP30 | TaUSP30(A) | TraesCS2A02G211100.1 | 195,309,009-195,314,693 | 1272 | 257 | 4.89 | 27,277 | A0A3B6AWP5 | 94 |
| TaUSP30(B) | TraesCS2B02G236700.1 | 237,343,301-237,348,967 | 1263 | 257 | 4.95 | 27,231.74 | A0A3B6C466 | 94 |
| TaUSP30(D) | TraesCS2D02G217300.1 | 180,876,671-180,877,843 | 941 | 256 | 4.95 | 27,261.72 | A0A3B6DE42 | 94.4 |
| TaUSP31a | TaUSP31a(A) | TraesCS2A02G112400.1 | 63,588,179-63,589,310 | 731 | 181 | 6.23 | 19,006 | A0A3B6ASX8 | 62.7 |
| TaUSP31a(B) | TraesCS2B02G131200.1 | 98,255,802-98,257,342 | 1194 | 180 | 5.89 | 18,988.53 | A0A3B6C0C0 | 62.7 |
| TaUSP31a(D) | TraesCS2D02G112900.1 | 62,552,204-62,553,439 | 961 | 180 | 5.73 | 18,832.28 | A0A3B6D7A9 | 62.7 |
| TaUSP31b | TaUSP31b(A) | TraesCS2A02G111700.1 | 63,137,318-63,140,788 | 731 | 169 | 7.77 | 17,987 | A0A3B6ARZ3 | 78.3 |
| TaUSP31b(B) | TraesCS2B02G130500.1 | 97,933,152-97,933,921 | 546 | 171 | 7.78 | 17,924.26 | A0A3B6C0H0 | 75.6 |
| TaUSP31b(D) | TraesCS2D02G112300.1 | 62,289,003-62,289,983 | 738 | 173 | 7.77 | 18,318.00 | A0A3B6D7R8 | 78.3 |
| TaUSP31c | TaUSP31c(A) | TraesCS2A02G112500.1 | 63,606,214-63,607,374 | 862 | 178 | 7.78 | 18,518 | A0A3B6ATE8 | 72.9 |
| TaUSP31c(B) | TraesCS2B02G131300.1 | 98,263,715-98,264,769 | 774 | 173 | 7.12 | 18,265.00 | A0A3B6C0F4 | 76.6 |
| TaUSP31c(D) | TraesCS2D02G113000.1 | 62,558,657-62,560,305 | 1283 | 177 | 8.36 | 18,449.22 | A0A3B6D7H3 | 73.6 |
| TaUSP31d | TaUSP31d(A) | TraesCS2A02G112600.1 | 63,610,223-63,611,477 | 981 | 233 | 5.55 | 23,600 | A0A3B6AS02 | 64.3 |
| TaUSP31d(B) | TraesCS2B02G131400.1 | 98,285,766-98,287,057 | 983 | 219 | 5.4 | 22,435.48 | A0A3B6C307 | 64.3 |
| TaUSP31d(D) | TraesCS2D02G113100.1 | 62,564,109-62,565,483 | 1046 | 220 | 5.28 | 22,371.39 | A0A3B6DAP6 | 64.3 |
| TaUSP32 | TaUSP32(B) | TraesCS7B02G409600.1 | 678,770,504-678,774,029 | 2136 | 606 | 6.12 | 67,353.55 | A0A3B6STI3 | 88.9 |
| TaUSP34 | TaUSP34(A) | TraesCS5A02G294700.1 | 503,523,770-503,528,172 | 2655 | 772 | 6.22 | 86,536.73 | A0A3B6KJR2 | 87.2 |
| TaUSP34(B) | TraesCS5B02G294000.1 | 478,482,408-478,486,782 | 2599 | 768 | 6.21 | 86,207.32 | A0A3B6LPW4 | 85.8 |
| TaUSP34(D) | TraesCS5D02G302100.1 | 398,530,847-398,535,258 | 2617 | 773 | 6.17 | 86,510.83 | A0A3B6MV00 | 86.9 |
| TaUSP35 | TaUSP35(A) | TraesCS2A02G079300.1 | 36,037,402-36,042,137 | 3010 | 790 | 8.8 | 88,227.26 | A0A3B6AQW9 | 83.1 |
| TaUSP35(B) | TraesCS2B02G094100.1 | 54,528,489-54,533,307 | 3298 | 791 | 8.78 | 88,529.45 | A0A3B6BZ91 | 81.8 |
| TaUSP36 | TaUSP36(A) | TraesCS5A02G151500.1 | 328,839,703-328,840,703 | 737 | 189 | 6.74 | 19,742.58 | A0A3B6KDS2 | 77 |
| TaUSP36(B) | TraesCS5B02G150100.1 | 278,029,271-278,030,305 | 758 | 189 | 7.64 | 20,014.05 | A0A3B6LID3 | 76 |
| TaUSP36(D) | TraesCS5D02G156700.1 | 244,632,387-244,633,356 | 725 | 191 | 7.09 | 19,948.85 | A0A3B6MN76 | 87.2 |
| TaUSP37 | TaUSP37(A) | TraesCS1A02G145700.1 | 251,936,266-251,937,029 | 684 | 227 | 9.94 | 23,727.93 | A0A3B5XY09 | 92.9 |
| TaUSP37(B) | TraesCS1B02G162600.1 | 199,671,726-199,673,397 | 1073 | 235 | 9.83 | 24,057.37 | A0A3B5YWA3 | 97.3 |
| TaUSP37(D) | TraesCS1D02G144300.1 | 199,671,726-199,673,397 | 1591 | 231 | 10.14 | 24,057.37 | A0A3B5ZRW2 | 97.3 |
| TaUSP42 | TaUSP42(D) | TraesCS5D02G120800.1 | 172,243,611-172,258,256 | 793 | 223 | 10 | 11,495.23 | A0A3B6MN77 | 94.7 |
| TaUSP42(A) | TraesCS5A02G208800.1 | 422,050,035-422,052,534 | 963 | 251 | 10.42 | 27,231.74 | A0A3B6KIH9 | 48.4 |
| TaUSP42(B) | TraesCS5B02G207100.1 | 375,945,683-375,949,689 | 1043 | 249 | 10.31 | 26,973 | A0A3B6LMD3 | 63.6 |
| TaUSP42(D) | TraesCS5D02G215100.1 | 324,476,246-324,477,708 | 1046 | 250 | 10.42 | 27,128.16 | A0A3B6MRI4 | 63.6 |
| TaUSP43 | TaUSP43(A) | TraesCS5A02G092100.1 | 127,532,912-127,534,709 | 1039 | 201 | 6.73 | 21,653.69 | A0A3B6KEW3 | 63.6 |
| TaUSP43(B) | TraesCS5B02G097500.1 | 128,852,473-128,854,044 | 691 | 201 | 6.7 | 21,626.60 | A0A3B6LI10 | 59.3 |
| TaUSP43(D) | TraesCS5D02G104300.1 | 118,009,761-118,011,305 | 828 | 201 | 6.73 | 21,696.66 | A0A3B6MMF7 | 78.4 |
| TaUSP44 | TaUSP44(A) | TraesCS5A02G092000.1 | 127,519,647-127,532,759 | 1010 | 172 | 6.35 | 18,307.88 | A0A3B6KE54 | 95.1 |
| TaUSP44(B) | TraesCS5B02G097600.1 | 128,854,165-128,856,400 | 1448 | 169 | 6.54 | 18,082.68 | A0A3B6LG72 | 95.1 |
| TaUSP44(D) | TraesCS5D02G104200.1 | 118,007,705-118,009,555 | 1050 | 169 | 6.82 | 18,005.60 | A0A3B6MMT4 | 95.1 |

**Supplementary Table 1.** TaUSP genes and their molecular attributes. **Bp:** base pairs; **aa:** amino acid; **pI:** Isoelectric point; **Mw:** Molecular weight, %**ID :** percentage identity.

| **MOTIFS** | **MOTIF SEQUENCE** | **WIDTH** | **SITES** | **E-value** |
| --- | --- | --- | --- | --- |
| Motifs 1 | RGLGAIKRALLGSVSDYCVHHAHCPVVIV | 29 | 64 | 2.1e-1119 |
| Motifs 2 | VLVAVDDSEESKHALEWALDH | 21 | 99 | 4.0e-837 |
| Motifs 3 | DPKEVJCEAVERHHADLLVLG | 21 | 86 | 4.9e-659 |
| Motifs 4 | PAGTFCYIDPEYQQTGKVTTKSDVYALGVVLLQJJTGRPPM | 41 | 26 | 5.9e-638 |
| Motifs 5 | QFQQEVEILSKIRHPNMVLLLGACPEYGCLVYEYM | 35 | 25 | 2.6e-558 |
| Motifs 6 | WQLRFRIAAEVATALLFLHSAKPEPJVHRDLKPANILLDRB | 41 | 26 | 1.3e-591 |
| Motifs 7 | SLRYRRYSIEEIZAATNNFSESLKIGEGGYGPVYKGK | 37 | 28 | 3.1e-441 |
| Motifs 8 | GDWPVEEARRFAELALKCCELRRRDRPDLGTEVLPELNRLR | 41 | 20 | 4.2e-404 |
| Motifs 9 | DVEAEMRRLRLELKQTMDMYNSACKEAJNAKQKAKELHRLKVEEARRYEE | 50 | 9 | 1.30E-234 |
| Motifs 10 | LLRPGDALVLLHV | 13 | 92 | 4.60E-225 |

**Supplementary Table 2**. Identified motif sequences along with their width, number of sites and respective E-values.

| **S.NO** | **USP** | **Transcript ID** | **Phosphorylation sites** |
| --- | --- | --- | --- |
| TaUSP1 | TaUSP1(A) | TraesCS3A02G092000.1 | 16 |
| TaUSP1(B) | TraesCS3B02G107200.1 | 16 |
| TaUSP1(D) | TraesCS3D02G091900.1 | 15 |
| TaUSP3 | TaUSP3(A) | TraesCS2A02G502200.1 | 13 |
| TaUSP3(B) | TraesCS2B02G530300.1 | 12 |
| TaUSP3(D) | TraesCS2D02G502700.2 | 13 |
| TaUSP4 | TaUSP4(A) | TraesCS3A02G208900.1 | 73 |
| TaUSP4(B) | TraesCS3B02G239200.1 | 65 |
| TaUSP4(D) | TraesCS3D02G211800.1 | 70 |
| TaUSP5 | TaUSP5(A) | TraesCS3A02G315600.1 | 26 |
| TaUSP5(B) | TraesCS3B02G351300.1 | 26 |
| TaUSP5(D) | TraesCS3D02G315900.1 | 24 |
| TaUSP7 | TaUSP7(A) | TraesCS3A02G385900.1 | 23 |
| TaUSP7(B) | TraesCS3B02G418000.1 | 20 |
| TaUSP7(D) | TraesCS3D02G378900.1 | 23 |
| TaUSP8 | TaUSP8(A) | TraesCS6A02G122700.1 | 65 |
| TaUSP8(B) | TraesCS6B02G150900.1 | 120 |
| TaUSP8(D) | TraesCS6D02G112900.1 | 72 |
| TaUSP9 | TaUSP9(A) | TraesCS6A02G182800.1 | 85 |
| TaUSP9(B) | TraesCS6B02G213600.1 | 87 |
| TaUSP9(D) | TraesCS6D02G172000.1 | 79 |
| TaUSP10 | TaUSP10(B) | TraesCS6B02G213500.2 | 77 |
| TaUSP11 | TaUSP11(A) | TraesCS6A02G272900.1 | 16 |
| TaUSP11(B) | TraesCS6B02G300300.1 | 16 |
| TaUSP11(D) | TraesCS6D02G252900.1 | 16 |
| TaUSP12 | TaUSP12(A) | TraesCS6A02G274200.1 | 14 |
| TaUSP12(B) | TraesCS6B02G301700.1 | 14 |
| TaUSP12(B) | TraesCS6B02G312700.1 | 14 |
| TaUSP12(D) | TraesCS6D02G254400.1 | 15 |
| TaUSP13 | TaUSP13(A) | TraesCS6A02G314000.1 | 11 |
| TaUSP13(B) | TraesCS6B02G344000.1 | 12 |
| TaUSP13(D) | TraesCS6D02G293300.1 | 10 |
| TaUSP14 | TaUSP14(A) | TraesCS6A02G323800.1 | 9 |
| TaUSP14(B) | TraesCS6B02G354400.1 | 9 |
| TaUSP14(D) | TraesCS6D02G303600.1 | 9 |
| TaUSP15 | TaUSP15(A) | TraesCS6A02G346100.1 | 86 |
| TaUSP15(B) | TraesCS6B02G379600.1 | 86 |
| TaUSP15(D) | TraesCS6D02G329000.1 | 90 |
| TaUSP16 | TaUSP16(A) | TraesCS4A02G072300.2 | 70 |
| TaUSP16(B) | TraesCS4B02G228200.1 | 68 |
| TaUSP16(D) | TraesCS4D02G229100.1 | 68 |
| TaUSP17 | TaUSP17(A) | TraesCS4A02G119400.1 | 9 |
| TaUSP17(B) | TraesCS4B02G185100.1 | 10 |
| TaUSP17(D) | TraesCS4D02G186500.1 | 10 |
| TaUSP19a | TaUSP19a(A) | TraesCS5A02G389700.1 | 17 |
| TaUSP19a(B) | TraesCS5B02G394700.1 | 12 |
| TaUSP19a(D) | TraesCS5D02G399600.1 | 15 |
| TaUSP19b | TaUSP19b(A) | TraesCS5A02G389500.1 | 16 |
| TaUSP19b(D) | TraesCS5D02G399500.1 | 20 |
| TaUSP19c | TaUSP19c(A) | TraesCS5A02G389400.1 | 13 |
| TaUSP19c(B) | TraesCS5B02G394600.2 | 16 |
| TaUSP19c(D) | TraesCS5D02G399400.1 | 13 |
| TaUSP20 | TaUSP20(A) | TraesCS5A02G114900.1 | 80 |
| TaUSP20(D) | TraesCS5D02G125300.1 | 81 |
| TaUSP21 | TaUSP21(A) | TraesCS1A02G106600.1 | 10 |
| TaUSP21(B) | TraesCS1B02G124100.1 | 9 |
| TaUSP21(D) | TraesCS1D02G108300.1 | 5 |
| TaUSP24 | TaUSP24(A) | TraesCS1A02G267800.1 | 23 |
| TaUSP24(B) | TraesCS1B02G278500.1 | 25 |
| TaUSP24(D) | TraesCS1D02G267700.1 | 24 |
| TaUSP25 | TaUSP25(A) | TraesCS1A02G280700.1 | 14 |
| TaUSP25(B) | TraesCS1B02G289700.1 | 13 |
| TaUSP25(D) | TraesCS1D02G279800.1 | 13 |
| TaUSP26 | TaUSP26(A) | TraesCS1A02G321000.1 | 32 |
| TaUSP26(B) | TraesCS1B02G333600.1 | 32 |
| TaUSP26(D) | TraesCS1D02G321100.1 | 31 |
| TaUSP27a | TaUSP27a(A) | TraesCS4A02G382700.1 | 64 |
| TaUSP27a(A) | TraesCS4A02G382900.1 | 120 |
| TaUSP27b | TaUSP27b(A) | TraesCS7A02G084400.3 | 122 |
| TaUSP27b(D) | TraesCS7D02G079400.1 | 108 |
| TaUSP30 | TaUSP30(A) | TraesCS2A02G211100.1 | 20 |
| TaUSP30(B) | TraesCS2B02G236700.1 | 20 |
| TaUSP30(D) | TraesCS2D02G217300.1 | 20 |
| TaUSP31a | TaUSP31a(A) | TraesCS2A02G112400.1 | 13 |
| TaUSP31a(B) | TraesCS2B02G131200.1 | 9 |
| TaUSP31a(D) | TraesCS2D02G112900.1 | 10 |
| TaUSP31b | TaUSP31b(A) | TraesCS2A02G111700.1 | 14 |
| TaUSP31b(B) | TraesCS2B02G130500.1 | 14 |
| TaUSP31b(D) | TraesCS2D02G112300.1 | 14 |
| TaUSP31c | TaUSP31c(A) | TraesCS2A02G112500.1 | 10 |
| TaUSP31c(B) | TraesCS2B02G131300.1 | 11 |
| TaUSP31c(D) | TraesCS2D02G113000.1 | 11 |
| TaUSP31d | TaUSP31d(A) | TraesCS2A02G112600.1 | 21 |
| TaUSP31d(B) | TraesCS2B02G131400.1 | 16 |
| TaUSP31d(D) | TraesCS2D02G113100.1 | 15 |
| TaUSP32 | TaUSP32(B) | TraesCS7B02G409600.1 | 63 |
| TaUSP34 | TaUSP34(A) | TraesCS5A02G294700.1 | 82 |
| TaUSP34(B) | TraesCS5B02G294000.1 | 81 |
| TaUSP34(D) | TraesCS5D02G302100.1 | 77 |
| TaUSP35 | TaUSP35(A) | TraesCS2A02G079300.1 | 63 |
| TaUSP35(B) | TraesCS2B02G094100.1 | 59 |
| TaUSP36 | TaUSP36(A) | TraesCS5A02G151500.1 | 17 |
| TaUSP36(B) | TraesCS5B02G150100.1 | 15 |
| TaUSP36(D) | TraesCS5D02G156700.1 | 16 |
| TaUSP37 | TaUSP37(A) | TraesCS1A02G145700.1 | 28 |
| TaUSP37(B) | TraesCS1B02G162600.1 | 29 |
| TaUSP37(D) | TraesCS1D02G144300.1 | 30 |
| TaUSP42 | TaUSP42(D) | TraesCS5D02G120800.1 | 21 |
| TaUSP42(A) | TraesCS5A02G208800.1 | 27 |
| TaUSP42(B) | TraesCS5B02G207100.1 | 24 |
| TaUSP42(D) | TraesCS5D02G215100.1 | 24 |
| TaUSP43 | TaUSP43(A) | TraesCS5A02G092100.1 | 16 |
| TaUSP43(B) | TraesCS5B02G097500.1 | 16 |
| TaUSP43(D) | TraesCS5D02G104300.1 | 15 |
| TaUSP44 | TaUSP44(A) | TraesCS5A02G092000.1 | 13 |
| TaUSP44(B) | TraesCS5B02G097600.1 | 14 |
| TaUSP44(D) | TraesCS5D02G104200.1 | 16 |

**Supplementary Table 3.** Phosphorylation sites in TaUSPs

| **S.NO** | **USP** | **Transcript ID** | **Position** | **Region** | **Score** |
| --- | --- | --- | --- | --- | --- |
| TaUSP1 | TaUSP1(A) | TraesCS3A02G092000.1 | 40 | NNSY | 0.6053 |
| TaUSP1(B) | TraesCS3B02G107200.1 | 40 | NNSY | 0.6123 |
| TaUSP1(D) | TraesCS3D02G091900.1 | 40 | NNSY | 0.6062 |
| TaUSP4 | TaUSP4(A) | TraesCS3A02G208900.1 | 508 | NGSL | 0.5831 |
| TaUSP4(B) | TraesCS3B02G239200.1 | 507 | NGSL | 0.5838 |
| 675 | NCTE | 0.6662 |
| TaUSP4(D) | TraesCS3D02G211800.1 | 507 | NGSL | 0.5831 |
| TaUSP5 | TaUSP5(A) | TraesCS3A02G315600.1 | 4 | NSSS | 0.7264 |
| TaUSP5(B) | TraesCS3B02G351300.1 | 4 | NSSS | 0.7264 |
| TaUSP5(D) | TraesCS3D02G315900.1 | 4 | NSSS | 0.7386 |
| TaUSP8 | TaUSP8(A) | TraesCS6A02G122700.1 | 213 | NDTS | 0.6361 |
| 564 | NVTQ | 0.5908 |
| 607 | NGSL | 0.56 |
| TaUSP8(B) | TraesCS6B02G150900.1 | 212 | NDTS | 0.6313 |
| 563 | NVTQ | 0.472 |
| 603 | NGSL | 0.5591 |
| TaUSP8(D) | TraesCS6D02G112900.1 | 213 | NDTS | 0.6349 |
| 564 | NVTQ | 0.5967 |
| 607 | NGSL | 0.5601 |
| TaUSP9 | TaUSP9(A) | TraesCS6A02G182800.1 | 59 | NQST | 0.5403 |
| TaUSP9(B) | TraesCS6B02G213600.1 | 59 | NQSR | 0.5457 |
| TaUSP9(D) | TraesCS6D02G172000.1 | 59 | NQST | 0.5381 |
| TaUSP10 | TaUSP10(B) | TraesCS6B02G213500.2 | 183 | NLSI | 0.6564 |
| 255 | NQSY | 0.3817 |
| 273 | NSSD | 0.7587 |
| 410 | NFSE | 0.5861 |
| 486 | NGSL | 0.6153 |
| 743 | NLST | 0.6423 |
| 749 | NHSL | 0.4178 |
| TaUSP11 | TaUSP11(A) | TraesCS6A02G272900.1 | 89 | NKSQ | 0.6371 |
| TaUSP11(B) | TraesCS6B02G300300.1 | 89 | NKSQ | 0.6263 |
| TaUSP11(D) | TraesCS6D02G252900.1 | 89 | NKSQ | 0.6617 |
| TaUSP12 | TaUSP12(A) | TraesCS6A02G274200.1 | 15 | NESS | 0.6569 |
| TaUSP12(B) | TraesCS6B02G301700.1 | 15 | NESS | 0.6569 |
| TaUSP12(B) | TraesCS6B02G312700.1 | 15 | NESS | 0.6569 |
| TaUSP12(D) | TraesCS6D02G254400.1 | 15 | NESS | 0.6568 |
| TaUSP13 | TaUSP13(A) | TraesCS6A02G314000.1 | 5 | NLSS | 0.7478 |
| TaUSP13(B) | TraesCS6B02G344000.1 | 5 | NLSS | 0.7472 |
| TaUSP13(D) | TraesCS6D02G293300.1 | 5 | NLSS | 0.7472 |
| TaUSP14 | TaUSP14(A) | TraesCS6A02G323800.1 | 149 | NATC | 0.5428 |
| 161 | NGSL | 0.3886 |
| TaUSP14(B) | TraesCS6B02G354400.1 | 149 | NATC | 0.5428 |
| 161 | NGSL | 0.3886 |
| TaUSP14(D) | TraesCS6D02G303600.1 | 149 | NATC | 0.5427 |
| 161 | NGSL | 0.3884 |
| TaUSP19 | TaUSP19a(B) | TraesCS5B02G394700.1 | 66 | NYSE | 0.6619 |
| TaUSP19a(A) | TraesCS5A02G114900.1 | 188 | NYSL | 0.6949 |
| 707 | NMSL | 0.6612 |
| TaUSP19a(D) | TraesCS5D02G125300.1 | 93 | NLSQ | 0.7537 |
| 188 | NYSL | 0.695 |
| 708 | NMSL | 0.6612 |
| TaUSP21 | TaUSP21(A) | TraesCS1A02G280700.1 | 154 | NASC | 0.5519 |
| TaUSP21(B) | TraesCS1B02G289700.1 | 154 | NASC | 0.5519 |
| TaUSP21(D) | TraesCS1D02G279800.1 | 154 | NASC | 0.5519 |
| TaUSP27 | TaUSP27a(A) | TraesCS4A02G382900.1 | 528 | NGSL | 0.6088 |
| 540 | NGTR | 0.6873 |
| 621 | NTTP | 0.1359 |
| 810 | NHSL | 0.4183 |
| TaUSP27b(A) | TraesCS7A02G084400.3 | 222 | NGTA | 0.5537 |
| 246 | NRSA | 0.56 |
| 530 | NGSL | 0.5919 |
| TaUSP27b(D) | TraesCS7D02G079400.1 | 527 | NGSL | 0.5924 |
| TaUSP31 | TaUSP31a(A) | TraesCS2A02G112400.1 | 25 | NKTV | 0.8126 |
| TaUSP31a(D) | TraesCS2D02G112900.1 | 24 | NKTV | 0.8154 |
| TaUSP32 | TaUSP32(B) | TraesCS7B02G409600.1 | 33 | NNSR | 0.4764 |
| 53 | NDSV | 0.596 |
| 149 | NCSV | 0.7066 |
| 179 | NISS | 0.7021 |
| 239 | NDTM | 0.5713 |
| 383 | NGTL | 0.7058 |
| TaUSP34 | TaUSP35(A) | TraesCS5A02G294700.1 | 487 | NGSL | 0.625 |
| TaUSP34(B) | TraesCS5B02G294000.1 | 482 | NGSL | 0.625 |
| TaUSP34(D) | TraesCS5D02G302100.1 | 487 | NGSL | 0.625 |
| TaUSP35 | TaUSP35(A) | TraesCS2A02G079300.1 | 272 | NSTL | 0.7223 |
| 444 | NCSS | 0.6943 |
| 493 | NRSV | 0.6562 |
| 559 | NSTP | 0.1842 |
| TaUSP35(B) | TraesCS2B02G094100.1 | 270 | NSTL | 0.7234 |
| 389 | NMSL | 0.5467 |
| 440 | NCSS | 0.6772 |
| 491 | NRSV | 0.6146 |

**Supplementary Table 4**. Glycosylation sites in TaUSPs

| **Proteins** | **a-helices** | **Extended strand (%)** | **Beta Turn (%)** | **Random coil** |
| --- | --- | --- | --- | --- |
| TaUSP4 | 40.49 | 9.85 | 4.59 | 45.07 |
| TaUSP10 | 46.3 | 11.67 | 4.8 | 37.22 |
| TaUSP21 | 35.54 | 20.48 | 6.63 | 37.35 |
| TaUSP30 | 31.91 | 15.56 | 6.61 | 45.91 |

| **S.NO.** | **Model** | **Ramachandran favored region (%)** | **Ramachandran outliers (%)** | **Rotamer outliers (%)** | **C-beta deviations** | **Bad Bonds** | **Bad angles** |
| --- | --- | --- | --- | --- | --- | --- | --- |
| **TraesUSP4** | **A** | 94.35 | 1.41 | 0.81 | 2 | 1/2300 | 18/3122 |
| **TraesUSP10** | **B** | 91.99 | 2.79 | 1.56 | 7 | 1/2366 | 38/3206 |
| **TraesUSP21** | **A** | 91.46 | 2.85 | 0.37 | 5 | 0/2476 | 51/3364 |
| **TraesUSP30** | **A** | 90.31 | 2.5 | 1.52 | 9 | 1/2520 | 67/3420 |

**Supplementary Table 5**. Predicted Secondary structures of TaUSPs

**Supplementary Table 6**. Properties of the predicted protein models

| **Protein** | **pockets** | **Area (SA) å** | **Volume (SA) å** | **AMINO ACIDS** | **Functional groups** | | | |
| --- | --- | --- | --- | --- | --- | --- | --- | --- |
| **Hydrogen bond donors** | **Hydrogen bond acceptors** | **hydrophobic interactions** | **hydrophobicity ratio** |
| TaUSP4 | p1 | 1526.76 | 1152.58 | ALA, ARG, ASN, ASP, GLN, GLU, GLY, ILE, LEU, LYS, MET, PRO, SER, THR, TYR, VAL | 36 | 83 | 56 | 0.32 |
|  | p2 | 1268.03 | 716.42 | ALA ARG, ASP, CYS, GLN, GLU, GLY, ILE, LEU, LYS, MET, PHE, PRO, SER, THR, TRP, TYR, VAL | 18 | 57 | 58 | 0.44 |
| TaUSP10 | p1(skin) | 1309.14 | 931.26 | ARG, ASN, GLN, GLU, GLY, HIS, LEU, LYS, THR, TYR, PRO | 15 | 42 | 53 | 0.48 |
|  | p2(purple) | 1062.04 | 516.8 | ALA, ARG, ASN, ASP, CYS, GLU, GLY, HIS, ILE, LEU, LYS, PRO, TYR, VAL | 24 | 70 | 51 | 0.35 |
| TaUSP21 | p1(skin) | 1615.8 | 999.55 | ALA, ARGG, ASN, ASP, GLU, GLY, ILE, LEU, LYS, PRO, SER, THR, TRP, VAL | 28 | 98 | 54 | 0.3 |
|  | p2(purple) | 948.32 | 847.84 | ALA, ARG, ASP, GLY, HIS, ILE, LEU, LYS, PRO, SER, TYR, VAL | 26 | 46 | 41 | 0.36 |
| TaUSP30 | p1(skin) | 1911.37 | 1384.29 | ALA, ARG, ASP, CYS, GLU, GLY, HIS, ILE, LEU, LYS, MET, PHE, PRO, SER, TRP, TYR, VAL | 37 | 98 | 93 | 0.41 |
|  | p2(purple) | 1073.64 | 653.03 | ALA, ARG, ASP, CYS, GLY, HIS, ILE, LUE, LYS, MET, PHE, PRO, SER, TYR, VAL | 25 | 66 | 34 | 0.27 |

**Supplementary Table 7**. Characteristic features of the binding pockets present in TaUSPs. **å:** Angstrom, **Ala**: Alanine, **Asp**: Aspartate, **Asn:** Asparagine, **Cys**: Cysteine, **Gln**: Glutamine, **Gly:** Glycine, **His:** Histidine, **Ile:** isoleucine, **Leu:** leucine, **Ser:** Serine (Ser), **Thr:** Threonine, **Val:** Valine, **Trp:** Tryptophan and **Tyr:** Tyrosine,
